# Supplementary material for: Dietary Polysaccharide-Rich Extract from Noni (Morinda citrifolia L.) Fruit Modified Ruminal Fermentation, Ruminal Bacterial Community and Nutrient Digestion in Cashmere Goats
Source: Animals (Basel). 2023 Jan 6;13(2):221. doi: 10.3390/ani13020221 (PMC9854603; doi:10.3390/ani13020221)
Supplement: Supplementary file 1 [file animals-13-00221-s001.zip › animals-2014797-supplementary.pdf]

**Supplementary Table S1.** Detailed list of compounds in NFP

| Compounds                             | Content (%) |
|---------------------------------------|-------------|
| Saccharide                            | 45.47       |
| Glucopyranoside                       | 9.88        |
| Glucoside                             | 15.6        |
| Fructofuranoside                      | 0.188       |
| Fructoside                            | 4.00        |
| Rhamnoside                            | 0.173       |
| Xyloside                              | 0.013       |
| Galactoside                           | 1.25        |
| Mannose and its derivatives           | 0.086       |
| Glucuronic acid and its derivatives   | 7.14        |
| Galacturonic acid and its derivatives | 0.126       |
| Lactose and its derivatives           | 0.457       |
| Sucrose and its derivatives           | 0.735       |
| Phenolic glucoside                    | 4.65        |
| Other glucoside                       | 0.388       |
| Oligosaccharide                       | 0.243       |
| Amylose                               | 0.098       |
| Others                                | 0.439       |
| Organic acids and their derivatives   | 21.37       |
| Monocarboxylic acid                   | 2.39        |
| Dicarboxylic acid                     | 0.079       |
| Aliphatic organic acids               | 15.9        |
| Aromatic organic acid                 | 0.710       |
| Furanic acid                          | 0.512       |
| Terpenoid acid                        | 0.048       |
| Others                                | 1.77        |
| Lipids                                | 6.09        |
| Fatty acids and their derivatives     | 1.42        |
| Phospholipids                         | 0.506       |
| Glycolipid                            | 0.108       |
| Lactone                               | 1.65        |
| Aromatic ester                        | 1.49        |
| Fatty acid ester                      | 0.915       |
| Alkaloids and their derivatives       | 6.14        |
| Tropane alkaloids                     | 1.66        |
| Furan alkaloids                       | 3.01        |
| Pyrrolidine alkaloids                 | 0.141       |
| Organic amines alkaloids              | 0.995       |
| Others                                | 0.339       |
| Amino acids and their derivatives     | 7.06        |
| Amino acid                            | 0.440       |
| Oligopeptides                         | 0.208       |
| Aliphatic group derivatives           | 2.51        |
| Aromatic group derivatives            | 0.138       |
| Sulfur-containing group derivatives   | 0.059       |
| Basic group derivatives               | 1.95        |

|                                         |       |
|-----------------------------------------|-------|
| Acid group derivatives                  | 0.003 |
| Amide group derivatives                 | 1.33  |
| Others                                  | 0.413 |
| Coumarins                               | 1.36  |
| Simple coumarins                        | 0.345 |
| Pyranocoumarins                         | 0.034 |
| Isocoumarin                             | 0.962 |
| Others                                  | 0.016 |
| Terpenes                                | 1.18  |
| Monoterpenes                            | 0.183 |
| Diterpenes                              | 0.013 |
| Triterpenes                             | 0.312 |
| Sesquiterpenoids                        | 0.005 |
| Saponins                                | 0.255 |
| Terpene ketones                         | 0.155 |
| Others                                  | 0.260 |
| Cholines                                | 1.22  |
| Cholines                                | 0.987 |
| Phosphorylcholine and its derivatives   | 0.092 |
| Phosphatidylcholine and its derivatives | 0.137 |
| Nucleotides and their derivatives       | 1.21  |
| Adenosine and its derivatives           | 0.551 |
| Cytarylate and its derivatives          | 0.254 |
| Guanylate and its derivatives           | 0.220 |
| Uridine acid and its derivatives        | 0.036 |
| Others                                  | 0.152 |
| Alcohols                                | 1.13  |
| Monohydric alcohols                     | 0.114 |
| Dihydric alcohols                       | 0.042 |
| Trihydric alcohols                      | 0.051 |
| Steroids                                | 0.399 |
| Fatty alcohols                          | 0.328 |
| Alkamines                               | 0.113 |
| Alkenols                                | 0.004 |
| Others                                  | 0.076 |
| Phenols and their derivatives           | 1.08  |
| Flavonoids                              | 0.349 |
| Non-flavonoid polyphenols               | 0.678 |
| Phenolic derivatives                    | 0.041 |
| Others                                  | 0.007 |
| Vitamins and their derivatives          | 0.47  |
| Ascorbic acid and its derivatives       | 0.139 |
| Other water-soluble vitamins            | 0.289 |
| Lipid-soluble vitamins                  | 0.030 |
| Others                                  | 0.016 |
| Salts                                   | 0.97  |
| Others                                  | 5.27  |

---

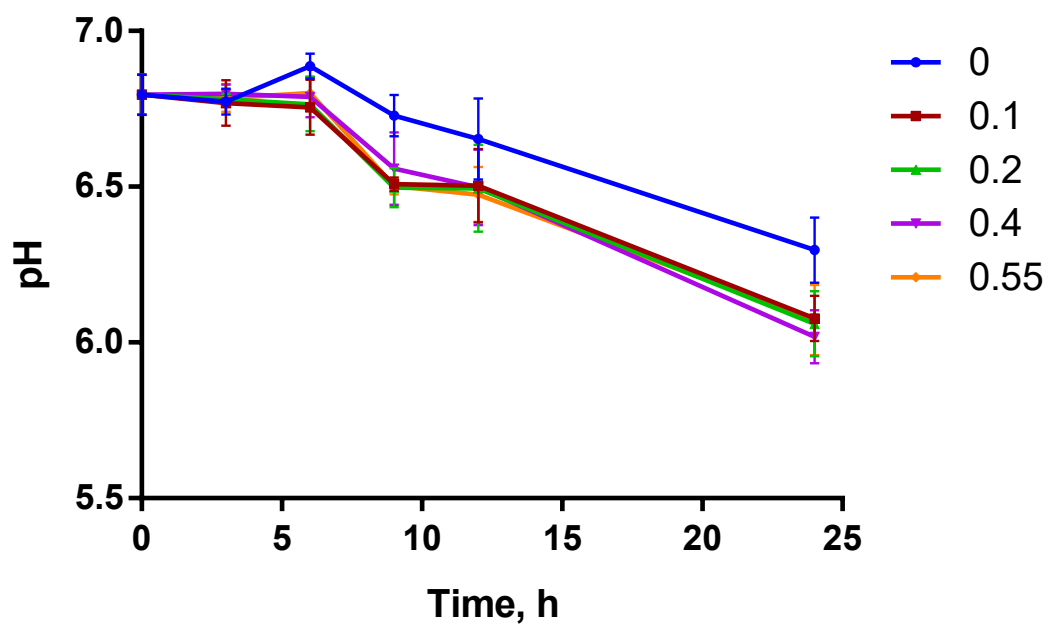

Supplementary Figure S1 Time course of the value of pH in inoculum in different treatments.

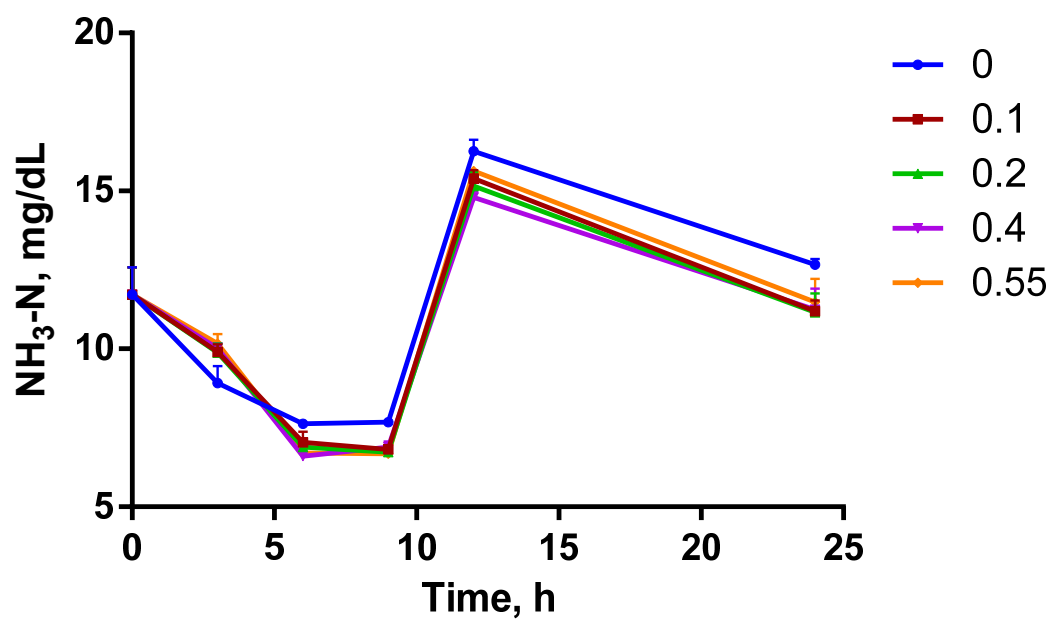

Supplementary Figure S2 Time course of the concentration of  $\text{NH}_3\text{-N}$  in inoculum in different treatments (Abbreviations:  $\text{NH}_3\text{-N}$ , ammonia nitrogen).
